# Supplementary material for: An old workhorse for new applications: Fe(dpm)3 as a precursor for low-temperature PECVD of iron(iii) oxide
Source: Royal Society of Chemistry journal article supplement (doi:10.1039/c5cp00435g), 2015-01-01
Supplement: c5cp00435g1.pdf [file c5cp00435g1.pdf]

## Electronic Supplementary Information

for

### An old workhorse for new applications: Fe(dpm)<sub>3</sub> as precursor for low- temperature PECVD of iron(III) oxide

G. Carraro<sup>a,\*</sup>, C. Maccato<sup>a,\*</sup>, A. Gasparotto<sup>a</sup>, D. Barreca<sup>b</sup>, M. Walter<sup>c,d</sup>, L. Mayrhofer<sup>c,d</sup>, M. Moseler<sup>c,d</sup>, A. Venzo<sup>b</sup>, R. Seraglia<sup>b</sup>, C. Marega<sup>a</sup>

<sup>a</sup> *Department of Chemistry - Padova University and INSTM - 35131 Padova, Italy.*

\*Corresponding authors. *E-mail:* [giorgio.carraro@unipd.it](mailto:giorgio.carraro@unipd.it) (G.C.);  
[chiara.maccato@unipd.it](mailto:chiara.maccato@unipd.it) (C.M.).

<sup>b</sup> *CNR-IENI and INSTM - Department of Chemistry - Padova University - 35131 Padova, Italy.*

<sup>c</sup> *Fraunhofer Institute for Mechanics of Materials - 79108 Freiburg, Germany.*

<sup>d</sup> *Freiburg Materials Research Center - Freiburg University - 79104 Freiburg, Germany.*  
*E-mail:* [michael.walter@iw.fraunhofer.de](mailto:michael.walter@iw.fraunhofer.de).

## NMR spectra of Fe(dpm)<sub>3</sub>

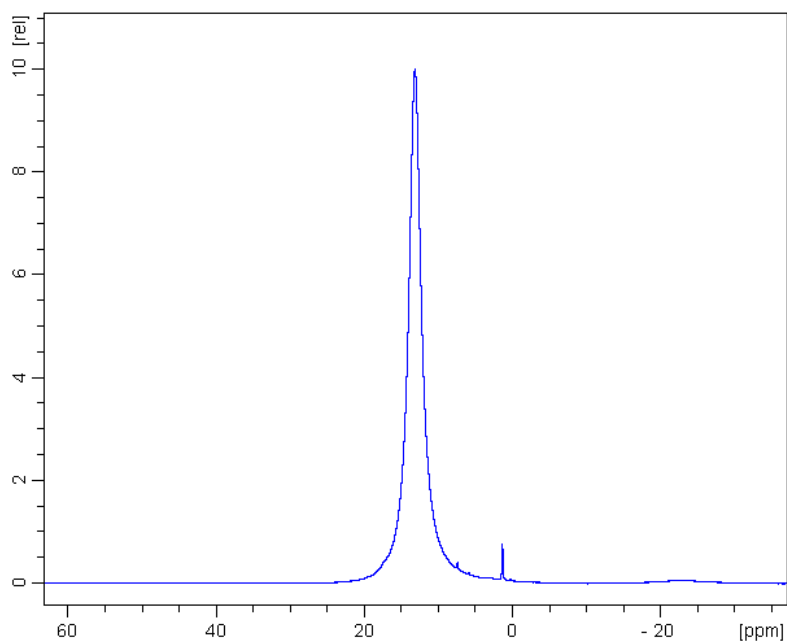

**Fig. S1.** <sup>1</sup>H-NMR spectrum of Fe(dpm)<sub>3</sub> in CDCl<sub>3</sub>. Experimental conditions: number of scans = 8, relaxation delay = 1 s, sweep width = 40 KHz, time domain = 256 Kwords. The chemical shift values are  $\delta \approx 13.04$  and  $\approx -22.8$  for CH<sub>3</sub> and CH protons, respectively. The signal at  $\delta 1.4$  is due to some residual H<sub>2</sub>O.

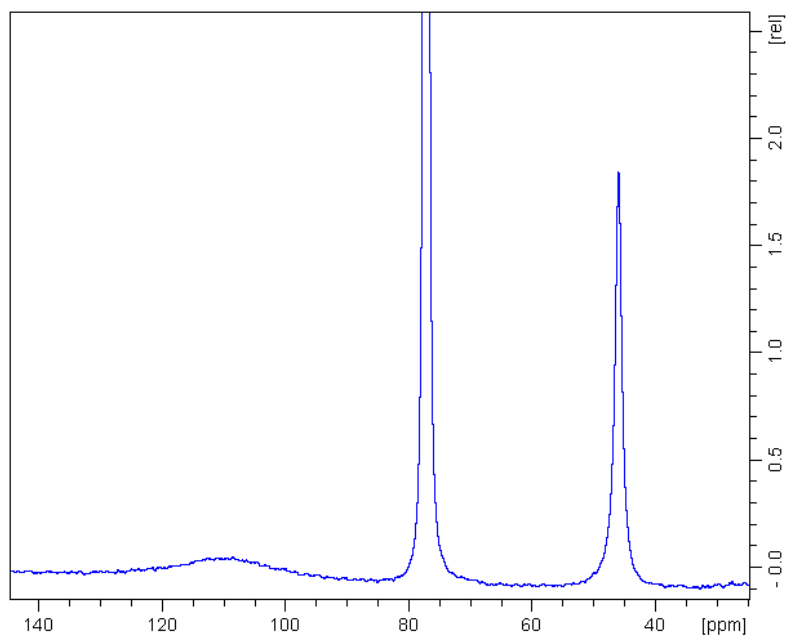

**Fig. S2.** <sup>13</sup>C NMR spectrum of Fe(dpm)<sub>3</sub> in CDCl<sub>3</sub>. Experimental conditions: number of scans = 54040, relaxation delay = 0.15 s, sweep width = 75 KHz, time domain = 8196 words. The chemical shift values are  $\delta \approx 45.9$  and  $\approx 110$  for CH<sub>3</sub> and CH carbons, respectively. The intense signal at  $\delta \approx 77$  is due to the solvent.

## Structural properties of Fe(dpm)<sub>3</sub>

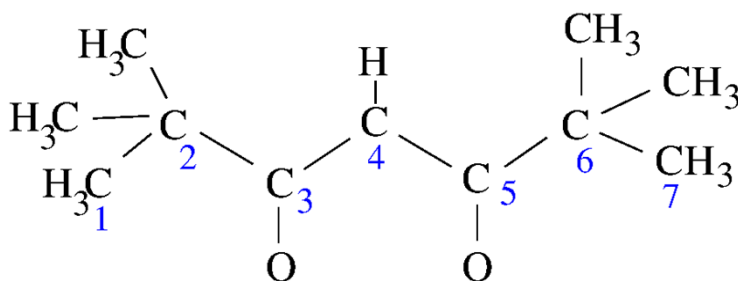

**Scheme 1.** Numbering of the carbon atoms in the dpm unit.

|                                                      | Exp. ref. <sup>a</sup> | PBE (U=0)<br>$S_z = 1/2 \hbar$ | PBE U=4<br>$S_z = 1/2 \hbar$ | PBE U=4<br>$S_z = 5/2 \hbar$ |
|------------------------------------------------------|------------------------|--------------------------------|------------------------------|------------------------------|
| C <sub>1</sub> -C <sub>2</sub> Distance              | 1.44                   | 1.53                           | 1.53                         | 1.54                         |
| C <sub>2</sub> -C <sub>3</sub> Distance              | 1.52                   | 1.54                           | 1.55                         | 1.55                         |
| C <sub>3</sub> -C <sub>4</sub> Distance              | 1.39                   | 1.40                           | 1.40                         | 1.40                         |
| C <sub>3</sub> -O Distance                           | 1.29                   | 1.28                           | 1.28                         | 1.28                         |
| O-O Distance                                         | 2.71                   | 2.79                           | 2.83                         | 2.81                         |
| Fe-O Distance                                        | 2.00                   | 2.03                           | 1.98                         | 1.95                         |
| C <sub>3</sub> -C <sub>4</sub> -C <sub>5</sub> Angle | 125°                   | 125°                           | 125°                         | 125°                         |

<sup>a</sup> reference [S1].

**Table S1.** Selected bond length (in Å) and bond angle values from experiment and simulation. The numbering according to Scheme 1 is used.

## Detailed assignments of theoretical vibrational lines for Fe(dpm)<sub>3</sub>

| assignment                                     | Fe(dpm) <sub>3</sub>                  |                |
|------------------------------------------------|---------------------------------------|----------------|
|                                                | $\nu$ [cm <sup>-1</sup> ]             | I [km/mol]     |
| $\gamma$ (CH <sub>3</sub> ) asym.              | 3027-3190 (39)                        | $\Sigma = 918$ |
| $\gamma$ (CH <sub>3</sub> ) symm.              | 2962-2976 (18)                        | $\Sigma = 572$ |
| $\gamma$ (CH <sub>3</sub> ) <sup>a</sup>       | 2964 <sup>a</sup> , 2866 <sup>a</sup> |                |
| $\gamma$ (C=O)                                 | 1543, 1549                            | 768, 817       |
| $\gamma$ (C-C)                                 | 1546 <sup>a</sup>                     | -              |
| $\beta$ (H)                                    | 1499, 1501, 1502<br>1506 <sup>a</sup> | 332, 270, 981  |
| $\delta_a$ [CH <sub>3</sub> ]                  | 1441                                  | 75             |
| $\gamma$ (C=O)                                 | 1399, 1408, 1419                      | 85, 67, 171    |
| $\delta_s$ [CH <sub>3</sub> ]                  | 1336-1373(18)<br>1396 <sup>a</sup>    | $\Sigma = 207$ |
| $\theta$ [ring]                                | 1257, 1258                            | 25, 15         |
| C(CH <sub>3</sub> ) <sub>3</sub> internal      | 1212, 1222, 1223                      | 73, 36, 32     |
| $\beta$ [C-H]                                  | 1158, 1161, 1166                      | 15, 22, 23     |
| $\theta$ [ring]                                | 1029, 1030                            | 114,100        |
| $\gamma$ [C-C(CH <sub>3</sub> ) <sub>3</sub> ] | 853, 854, 856<br>872 <sup>a</sup>     | 36, 46, 75     |
| $\pi$ [C-H]                                    | 788, 792<br>820, 794 <sup>a</sup>     | 20,15          |
| $\gamma$ [Fe-O]                                | 603, 604<br>623 <sup>a</sup>          | 66, 74         |
| $\gamma$ [Fe-O]                                | 485, 487<br>480, 502 <sup>a</sup>     | 64, 62         |

<sup>a</sup> reference [S2].

**Table S2.** Main IR transitions for the Fe(dpm)<sub>3</sub> complex. Symbols:  $\gamma$  = in-plane stretching;  $\beta$  = in-plane bending;  $\delta_s$  = symmetric bending;  $\delta_a$  = asymmetric bending;  $\pi$  = out-of-plane bending;  $\theta$  = breathing mode. The values in brackets denote the multiplicity of the IR-transitions forming a band of similar character. The band intensity I is summed up accordingly.

## Electronic structure of Fe(dpm)<sub>3</sub>

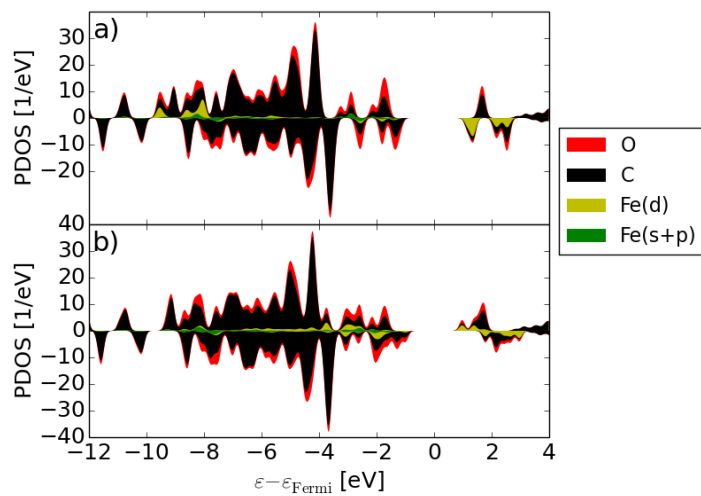

**Fig. S3.** Projected density of states (PDOS) of the Fe(dpm)<sub>3</sub> complex in the relaxed configurations of each spin state: a)  $S_z = 5/2\hbar$  and b)  $S_z = \hbar/2$ . Majority and minority spin PDOS are plotted as positive and negative numbers, respectively.

## Correlation between bond order and bond length

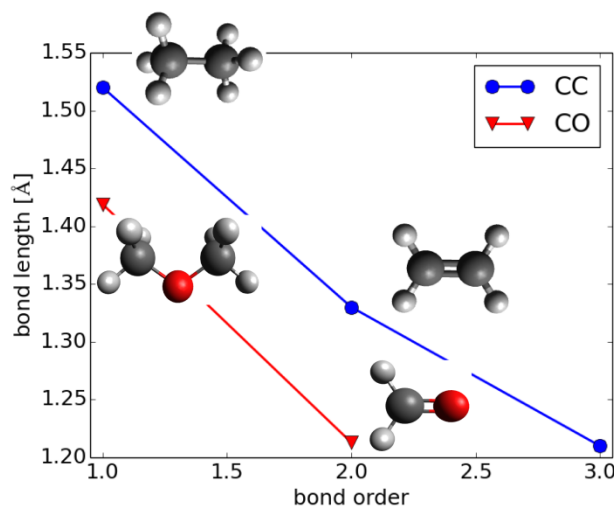

**Fig. S4.** PBE bond lengths depending on the nominal bond order (reproduction of Fig. 5c in the main text), showing the near linear correlation between CC and CO bond length and theoretical bond order. The displayed PBE bond lengths are for: ethane,  $C_2H_6$  (single bond,  $R_{CC} = 1.52 \text{ \AA}$ ); ethylene,  $C_2H_4$  (double bond,  $R_{CC} = 1.33 \text{ \AA}$ ); acetylene,  $C_2H_2$  (triple bond,  $R_{CC} = 1.21 \text{ \AA}$ ); dimethyl ether,  $CH_3OCH_3$  (single bond,  $R_{CO} = 1.42 \text{ \AA}$ ); formaldehyde,  $H_2CO$  (double bond,  $R_{CO} = 1.21 \text{ \AA}$ ).

### References

- [S1] M. A. K. Ahmed, H. Fjellvåg, A. Kjekshus and D. S. Wragg, *Z. Anorg. Allg. Chem.*, 2013, **639**, 770-778.
- [S2] Y. Jiang, M. Liu, Y. Wang, H. Song, J. Gao and G. Meng, *J. Phys. Chem. A*, 2006, **110**, 13479-13486.
